# Supplementary material for: Discovery of a Non-Nucleoside SETD2 Methyltransferase Inhibitor against Acute Myeloid Leukemia
Source: MDPI journal article supplement (doi:10.3390/ijms221810055), 2021-09-17
Supplement: s1 [file s1]

## Supplementary Material

# Discovery of a non-nucleoside SETD2 methyltransferase inhibitor against acute myeloid leukemia

*Zsolt Bognár<sup>1,‡</sup>, Dávid Bajusz<sup>1,‡</sup>, Jessica Ebner<sup>2,‡</sup>, Florian Grebien<sup>2</sup>, György M. Keserű<sup>1,\*</sup>*

<sup>1</sup> Medicinal Chemistry Research Group, Research Centre for Natural Sciences, Magyar tudósok  
krt. 2, 1117 Budapest, Hungary

<sup>2</sup> Institute for Medical Biochemistry, University of Veterinary Medicine, Veterinärplatz 1, 1220  
Vienna, Austria

‡These authors contributed equally.

\*Corresponding author: György M. Keserű, keseru.gyorgy@ttk.hu

### Table of contents

|                                                               |    |
|---------------------------------------------------------------|----|
| 1. Inhibitory activities of reported sinefungin analogs ..... | 2  |
| 2. Developing the pharmacophore model for pre-screening ..... | 2  |
| 3. Docking protocol .....                                     | 5  |
| 4. Substructure filter .....                                  | 8  |
| 5. Virtual hits and primary screening results .....           | 9  |
| 6. Cellular Validation of hit compound C13 .....              | 19 |
| 7. Other potential targets .....                              | 20 |
| 8. References .....                                           | 22 |

## 1. Inhibitory activities of reported sinefungin analogs

**Table S1.** IC<sub>50</sub> values or (in lack thereof) percent inhibition values of reported sinefungin analogs.<sup>1,2</sup>

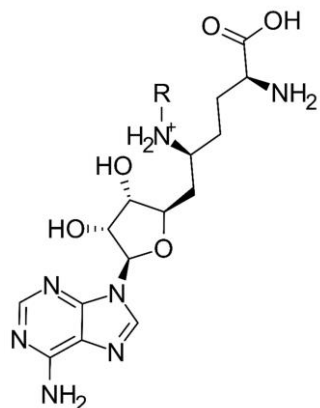

| R group                            | IC <sub>50</sub> (μM) <sup>2</sup> | IC <sub>50</sub> (μM) <sup>1</sup> | % Inh. @ 30 μM <sup>1</sup> |
|------------------------------------|------------------------------------|------------------------------------|-----------------------------|
| H (sinefungin)                     | 28 ± 2                             |                                    | 71                          |
| Me                                 | > 100                              |                                    |                             |
| Et                                 | 8 ± 1                              |                                    |                             |
| Pr                                 | 0.8 ± 0.2                          | 0.49                               |                             |
| iBu                                |                                    | 0.29                               |                             |
| nPent                              |                                    | 3.9                                |                             |
| Bn                                 | 0.5 ± 0.1                          | 1.2                                |                             |
| CH <sub>2</sub> CH(OH)Me           |                                    |                                    | 46                          |
| (CH <sub>2</sub> ) <sub>3</sub> OH |                                    |                                    | 36                          |

## 2. Developing the pharmacophore model for pre-screening

The E-pharmacophore module of Schrödinger's Phase<sup>3,4</sup> was used to create a pharmacophore model for each of five PDB structures (4FMU,<sup>2</sup> 5LSS, 5LSX, 5LSY, and 5LT6<sup>1</sup>) containing the most active (low micromolar or submicromolar) inhibitors of SETD2, namely Pr-SNF, iBu-SNF,

The chemical structure shows a complex molecule with several labeled substituents and functional groups. On the left, there is a carboxylate group ( $\text{COO}^-$ ) and a primary amine group ( $\text{NH}_3^+$ ). The main chain is a long alkyl chain with a chiral center marked with a wedge bond. This is followed by a side chain containing a secondary amine ( $\text{NH}_2^+$ ) and a phosphate group ( $\text{LP}$ ). The side chain is further substituted with a green label  $\text{LH/LR}$  and a blue label  $\text{R}$ . The main chain continues to a five-membered ring containing an oxygen atom, which is substituted with a blue label  $\text{SD2}$  and a red label  $\text{SA2}$ . This ring is connected to a pyrimidine ring system, which is substituted with a blue label  $\text{SD1}$  and a red label  $\text{SA1}$ . The pyrimidine ring has two nitrogen atoms labeled  $\text{R5}$  and  $\text{R6}$ , and a red label  $\text{R5A}$  near one of the nitrogens. The pyrimidine ring is also substituted with a blue label  $\text{RD}$  and a red label  $\text{R6A}$ . The entire molecule is shown with various stereochemical indicators, including wedge and dash bonds.

The E-pharmacophore module evaluates a protein-ligand complex by scoring the ligand in place with the Glide XP scoring function and breaking down the docking score into score contributions of the different pharmacophoric features to assess their importance in the formation of the protein-ligand complex. (A larger negative score contribution means an energetically more favorable interaction.) To construct a consensus model, the docking score contributions for each feature were determined in the models, these are summarized in Table S2.

**Table S2.** Glide XP docking score contributions of the pharmacophoric features of N-alkyl sinefungins.

| Ligand  | PDB  | R6    | R5    | R6A  | RD    | R5A  | SA1   | SD1  | SA2   | SD2   | OP    | ON   | LP    | LH/LR |
|---------|------|-------|-------|------|-------|------|-------|------|-------|-------|-------|------|-------|-------|
| Pr-SNF  | 4fmu | 0     | -0.76 | -1.7 | -1.7  | 0    | -2.04 | 0    | 0     | -0.7  | 0     | -0.7 | 0     | 0     |
| Pr-SNF  | 5lss | -1.18 | 0     | 0    | -1.7  | -1.7 | 0     | -1.6 | -1.42 | 0     | -1    | 0    | -1    | 0     |
| Bn-SNF  | 5lsx | 0     | -0.71 | -2.2 | -0.69 | 0    | -0.16 | 0    | 0     | -1.6  | -1    | 0    | -1    | -2.03 |
| iBu-SNF | 5lsy | 0     | -0.55 | -2.2 | -0.7  | 0    | 0     | 0    | 0     | -1.38 | -1    | 0    | -1    | -0.3  |
| Pe-SNF  | 5lt6 | -1.21 | 0     | 0    | -0.7  | -2.2 | 0     | 0    | -1.6  | 0     | -0.96 | 0    | -0.96 | -0.6  |

Based on this data, the pharmacophore elements labeled R6A, RD, OP and LP were clearly significant, but R5 and SD2 should also be taken into further consideration. Pharmacophore model variations were established using different combinations of these elements, also evaluating whether accepting an equivalence between hydrogen bond donors and positive charges is advantageous or not. The appropriate elements were selected based on the 5LSS<sup>1</sup> PDB structure, with a tolerance range of 2.00 Å. The atoms of the receptor binding pocket were marked as exclusion zones, forcing the model to discard any ligands that would make a steric clash with the receptor. The training set was prepared as described in the Materials and methods section and was screened using each of these model variations. The results are summarized in Table S3. Here, the HYP3 pharmacophore model has minimized the number of retrieved decoys (false positives), while keeping all nine of the known SETD2 inhibitors, therefore this model was selected for further usage (its 3D representation is shown in Figure 2B). The HYP3 model boasts excellent early enrichment factors (ROC enrichments of 40 and 28 at 1% and 2% false positive rate, respectively<sup>5</sup>), an area under the ROC curve (AUC) value of 0.97, and a BEDROC value (at an  $\alpha$  setting of 20.0) of 0.702.

**Table S3.** Pharmacophore model (hypothesis) variants, with the number of actives and decoys retrieved from the training set. (D=P means that hydrogen bond donors and positive charges were considered to be equivalent.)

| Hypothesis | Pharmacophore elements |    |    |    |    |     |     | Actives found | Decoys found |
|------------|------------------------|----|----|----|----|-----|-----|---------------|--------------|
| HYP1       | R6A                    | RD | OP | LP |    |     |     | 8             | 38           |
| HYP2       | R6A                    | RD | OP | LP |    |     | D=P | 9             | 340          |
| HYP3       | R6A                    | RD | OP | LP | R5 |     |     | 9             | 110          |
| HYP4       | R6A                    | RD | OP | LP | R5 |     | D=P | 9             | 401          |
| HYP5       | R6A                    | RD | OP | LP | R5 | SD2 |     | 9             | 302          |
| HYP6       | R6A                    | RD | OP | LP | R5 | SD2 | D=P | 9             | 428          |
| HYP7       | R6A                    | RD | OP | LP |    | SD2 |     | 9             | 149          |
| HYP8       | R6A                    | RD | OP | LP |    | SD2 | D=P | 9             | 395          |

### 3. Docking protocol

To determine which PDB structures to use for docking, we assessed their performances individually and in combination. Nine of the original ligands present in the available PDB structures (SAM, SAH, SNF, and various N-alkyl sinefungins) were prepared with LigPrep, as described in the Materials and methods section. Grid files were generated for each of the eight PDB structures of interest. Since the binding of SAM to SETD2 shows strong anchoring features (similarly to the binding mode of ATP to protein kinases), we considered using docking constraints. The characteristic hydrogen bonding pattern of the adenine core was mimicked by incorporating the backbone NH and carbonyl oxygen of His1629, as well as the backbone NH of Phe1679 as possible locations for hydrogen bond constraints. Three additional constraint sites were also examined, corresponding to the anchoring residues of the protonated secondary amine: Arg1625, Met1627, and Tyr1604. The ligands were redocked into the receptor grids using Schrödinger Glide standard precision (SP) docking,<sup>6–8</sup> optionally with different combinations of the aforementioned constraints.

Somewhat surprisingly, we were able to obtain the most promising docking scores and RMSD values by using none of the constraints, as summarized in Table S4. Nonetheless, to obtain more relevant docking poses during prospective screening, we have incorporated a post-docking check for the constraints, requiring at least two of the three H-bonds in the adenine pocket to be formed.

**Table S4.** A) Docking scores for each ligand with different constraint settings (best score out of the eight structures). B) RMSD values for each ligand with different constraint settings (best score out of the eight structures), between the re-docked and original crystallographic binding pose. The constraint settings are as follows: no constraints, 2 required out of 6 possible constraints, 3 required out of 6 possible constraints, 2 required out of 3 possible constraints (sec. amine anchors), 2 required out of 3 possible constraints (adenine core anchors).

| A | Ligand       | No constraint | 2 of 6 required | 3 of 6 required | 2 of 3 (sidechain) | 2 of 3 (adenine) |
|---|--------------|---------------|-----------------|-----------------|--------------------|------------------|
|   | 2(OH)-Pr-SNF | -12.897       | -12.4           | -12.423         | -12.717            | -12.845          |
|   | 3(OH)-Pr-SNF | -12.694       | -8.923          |                 | -11.14             | -11.468          |
|   | Bn-SNF       | -13.677       | -10.897         | -11.78          | -11.095            | -9.904           |
|   | iBu-SNF      | -12.710       | -10.662         | -8.668          | -13.346            | -12.004          |
|   | Pe-SNF       | -9.866        | -10.448         | -4.986          | -10.616            | -9.068           |
|   | Pr-SNF       | -12.672       | -9.158          | -9.505          | -10.163            | -12.637          |
|   | SAH          | -11.440       | -9.701          |                 | -7.11              | -11.327          |
|   | SAM          | -11.317       | -7.562          | -7.344          | -7.728             | -9.272           |
|   | SNF          | -11.624       | -8.946          | -6.729          | -9.151             | -11.463          |

| B | Ligand       | No constraint | 2 of 6 required | 3 of 6 required | 2 of 3 (sidechain) | 2 of 3 (adenine) |
|---|--------------|---------------|-----------------|-----------------|--------------------|------------------|
|   | 2(OH)-Pr-SNF | 0.544         | 0.717           | 0.721           | 0.697              | 0.567            |
|   | 3(OH)-Pr-SNF | 0.381         | 3.033           |                 | 0.573              | 0.646            |
|   | Bn-SNF       | 0.572         | 2.015           | 2.079           | 2.165              | 2.214            |
|   | iBu-SNF      | 0.518         | 1.956           | 1.657           | 0.313              | 0.602            |
|   | Pe-SNF       | 3.953         | 3.484           | 5.256           | 3.092              | 6.757            |
|   | Pr-SNF       | 0.713         | 3.121           | 3.015           | 0.95               | 0.747            |
|   | SAH          | 0.508         | 0.743           |                 | 3.659              | 0.526            |
|   | SAM          | 0.580         | 5.054           | 5.889           | 5.794              | 4.379            |
|   | SNF          | 0.637         | 3.159           | 4.111           | 3.292              | 0.465            |

Next, the individual performance of the different docking grids was evaluated, and the constraint system described above was applied. Each of the nine ligands were redocked into each of the eight possible docking grids. Docking scores and RMSD values are reported in Table S5. From this data, we have come to the conclusion that by applying the combination of the receptor grids of the structures 5JLE<sup>9</sup> and 5LSY<sup>1</sup> (ensemble docking), along with the constraint requirements described earlier, the software was able to reproduce the crystallographic docking poses of the known ligands with satisfying docking scores and RMSD distances; this is summarized in Figure

S2A. Pe-SNF proved to be an outlier from this data, presumably because the relatively long n-pentyl chain in the molecule enables a large number of conformational states, significantly challenging the docking algorithm. Additionally, we have used single linkage clustering to assess whether these two protein structures sufficiently cover the conformational space of SETD2 binding pocket (Figure S2B).

**Table S5.** A) Docking scores for each ligand docked into each PDB structure. B) RMSD values for each ligand docked into each PDB structure (between the re-docked and original crystallographic binding pose).

**A**

| Original structure | Ligand       | 5jle    | 5lss    | 5lsy    | 5lsz    | 4fmu    | 5lt6    | 5lt7    | 5lt8    |
|--------------------|--------------|---------|---------|---------|---------|---------|---------|---------|---------|
| 5lt7               | (2OH)-Pr-SNF | -9.707  | -10.731 | -12.030 | -12.791 | -10.857 | -9.961  | -12.897 | -10.237 |
| 5lsz               | (3OH)-Pr-SNF | -9.314  | -9.299  | -11.607 | -12.694 | -9.406  | -6.430  | -10.884 | -8.840  |
| 5lsx               | Bn-SNF       | -8.300  | -10.969 | -13.677 | -7.466  | -10.926 | -10.751 | -13.357 | -9.073  |
| 5lsy               | iBu-SNF      | -6.984  | -11.319 | -11.911 | -12.710 | -11.184 | -9.893  | -12.513 | -8.641  |
| 5lt6               | Pe-SNF       | -8.105  | -9.866  | -8.444  | -9.808  | -8.999  | -7.447  | -9.602  | -8.752  |
| 5lss               | Pr-SNF       | -8.760  | -10.978 | -11.603 | -12.672 | -8.705  | -9.749  | -9.125  | -9.535  |
| 5jle               | SAH          | -11.440 | -7.127  | -10.766 | -6.565  | -7.396  | -7.966  | -7.506  | -8.601  |
| 5v21               | SAM          | -11.317 | -10.369 | -9.899  | -9.637  | -8.041  | -8.224  | -8.203  | -8.588  |
| 5lt8               | SNF          | -11.236 | -11.170 | -10.733 | -11.624 | -10.455 | -6.193  | -8.962  | -9.066  |

**B**

| Original structure | Ligand       | 5jle  | 5lss  | 5lsy  | 5lsz  | 4fmu  | 5lt6  | 5lt7  | 5lt8  |
|--------------------|--------------|-------|-------|-------|-------|-------|-------|-------|-------|
| 5lt7               | (2OH)-Pr-SNF | 4.980 | 1.774 | 0.607 | 0.727 | 1.927 | 2.447 | 0.544 | 5.017 |
| 5lsz               | (3OH)-Pr-SNF | 4.895 | 3.962 | 0.832 | 0.381 | 3.965 | 7.546 | 1.922 | 4.767 |
| 5lsx               | Bn-SNF       | 5.492 | 4.114 | 0.572 | 9.604 | 0.844 | 1.479 | 0.662 | 7.718 |
| 5lsy               | iBu-SNF      | 6.764 | 1.673 | 0.533 | 0.846 | 1.806 | 2.903 | 0.659 | 5.019 |
| 5lt6               | Pe-SNF       | 8.061 | 3.953 | 4.512 | 4.038 | 4.044 | 7.749 | 3.979 | 8.168 |
| 5lss               | Pr-SNF       | 4.453 | 1.857 | 0.851 | 0.730 | 3.904 | 3.509 | 3.156 | 4.673 |
| 5jle               | SAH          | 0.508 | 5.165 | 0.940 | 3.541 | 4.282 | 2.737 | 3.646 | 4.376 |
| 5v21               | SAM          | 0.580 | 0.823 | 0.946 | 3.740 | 4.402 | 2.803 | 4.726 | 4.453 |
| 5lt8               | SNF          | 0.492 | 0.687 | 0.816 | 0.637 | 0.831 | 8.401 | 4.088 | 4.110 |

Importantly, the docking protocol was further validated with the training set described earlier, also assessing the effect of applying the pharmacophore-based pre-screening. Briefly, the protocol retrieved all of the nine known actives with excellent early enrichment factors (ROC enrichments of 80 and 44 at 1% and 2% false positive rate, respectively<sup>5</sup>) and an area under the ROC curve (AUC) value of 0.97, which was further increased to 0.99 by the application of pharmacophore-based pre-screening. BEDROC values (at an  $\alpha$  setting of 20.0) were 0.816 and 0.854 for these cases, respectively.

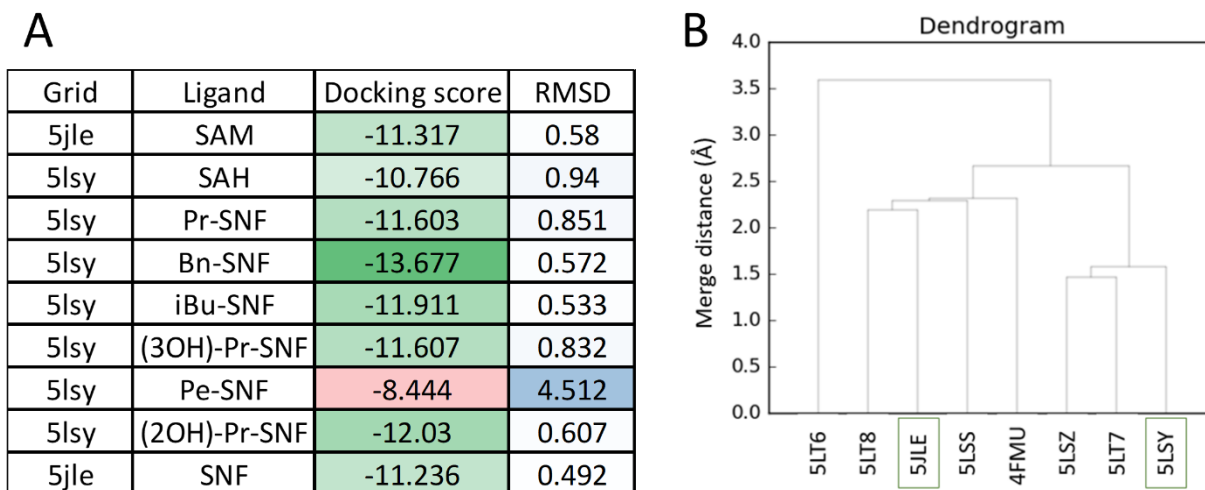

**Figure S2.** A) Docking results for the sinefungin analogs, using the combination of the 5JLE and 5LSY grids (ensemble docking). B) Single linkage clustering of the binding sites of the eight SETD2 structures. The structures 5JLE<sup>9</sup> and 5LSY<sup>1</sup> represent two clearly distinct sets of possible conformations. The structures 5LT6<sup>1</sup> is a singleton, which was not applied in the docking protocol due to its suboptimal performance (Table S4).

#### 4. Substructure filter

With the aim of cutting down the screened dataset, while retaining compounds with at least a minimal structural resemblance to the natural cofactor SAM and sinefungin derivatives, a



substructure query was created, as summarized in Figure S3. In this general structure, A symbolizes any non-hydrogen atoms. The (a) notation on the terminal heavy atom means that the atom is in an aromatic bond, and the (X4) notation of the carbon connected to the basic nitrogen implies an  $sp^3$  hybridization state. X is to be understood as either H or C(X4), allowing for (but not explicitly requiring) an arbitrary sidechain. The linker length is defined as  $4 \leq n \leq 10$  (this allows for linear or ring-containing linkers as well). To summarize the requirements, we included compounds where a basic nitrogen atom (the importance of this functional unit was highlighted by Zheng et al.<sup>2</sup>) is found at a distance of 6-12 bonds from an aromatic ring (which mimics the adenine moiety in the known ligands).

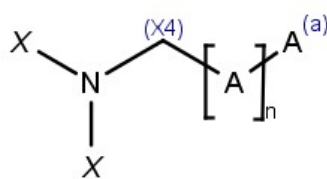

**Figure S3.** Substructure query

## 5. Virtual hits and primary screening results

**Table S6.** This table summarizes the structures, docking and IFP scores, primary screening results (SETD2 inhibition in an enzyme assay at 100  $\mu$ M screening concentration), vendor availability and purity of the purchased virtual hit compounds. Purities are reported as normalized peak integrals from quality control LC-MS measurements, as reported by the respective vendors.

| Name | MCULE ID | Structure | Docking score | IFP similarity | SETD2 inhibition @ 100 $\mu$ M (%) | Vendor | Vendor ID | Purity (%) |
|------|----------|-----------|---------------|----------------|------------------------------------|--------|-----------|------------|
|------|----------|-----------|---------------|----------------|------------------------------------|--------|-----------|------------|

| Name | MCULE ID         | Structure                                                                           | Docking score | IFP similarity | SETD2 inhibition @ 100μM (%) | Vendor  | Vendor ID   | Purity (%) |
|------|------------------|-------------------------------------------------------------------------------------|---------------|----------------|------------------------------|---------|-------------|------------|
| C1   | MCULE-8470427732 | 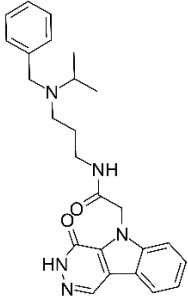   | -11.284       | 0.518          | Unavailable                  |         |             |            |
| C2   | MCULE-2766139226 |   | -12.347       | 0.308          | 69                           | Enamine | Z189630650  | 97         |
| C2_2 | MCULE-6642938474 |  | -11.736       | 0.450          | 68                           | Enamine | Z1457280314 | 95         |
| C3   | MCULE-4424512136 |  | -11.554       | 0.330          | n/a                          | Enamine | Z28553385   | 99+        |

| Name | MCULE ID         | Structure                                                                           | Docking score | IFP similarity | SETD2 inhibition @ 100μM (%) | Vendor     | Vendor ID | Purity (%) |
|------|------------------|-------------------------------------------------------------------------------------|---------------|----------------|------------------------------|------------|-----------|------------|
| C3_2 | MCULE-4913493552 | 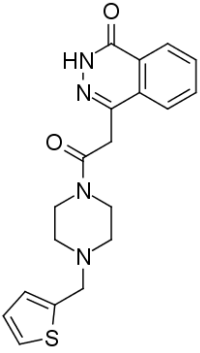   | -11.230       | 0.313          | 76                           | Enamine    | Z73429504 | 99+        |
| C4   | MCULE-3048299164 |   | -10.351       | 0.278          | 62                           | Chembridge | 78015614  | 99+        |
| C5   | MCULE-5532693412 |  | -10.940       | 0.309          | 27                           | Chembridge | 37967057  | 99+        |

| Name | MCULE ID         | Structure                                                                           | Docking score | IFP similarity | SETD2 inhibition @ 100μM (%) | Vendor     | Vendor ID  | Purity (%) |
|------|------------------|-------------------------------------------------------------------------------------|---------------|----------------|------------------------------|------------|------------|------------|
| C6   | MCULE-2122031183 | 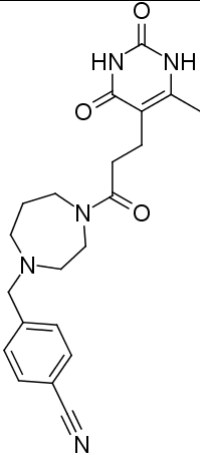   | -11.475       | 0.461          | 58                           | Enamine    | Z238004248 | 99+        |
| C7   | MCULE-8414174224 |   | -11.423       | 0.412          | 37                           | Chembridge | 65644214   | 99+        |
| C8   | MCULE-7362946334 |  | -10.448       | 0.309          | 46                           | Chembridge | 18554635   | 99+        |

| Name | MCULE ID         | Structure                                                                           | Docking score | IFP similarity | SETD2 inhibition @ 100μM (%) | Vendor     | Vendor ID | Purity (%) |
|------|------------------|-------------------------------------------------------------------------------------|---------------|----------------|------------------------------|------------|-----------|------------|
| C9   | MCULE-8896831552 | 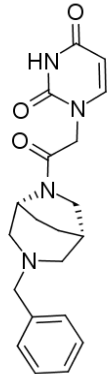   | -11.604       | 0.281          | 82                           | Chembridge | 75335369  | 99+        |
| C9_2 | MCULE-7693546359 |   | -10.396       | 0.289          | 54                           | Chembridge | 31105034  | 99+        |
| C9_3 | MCULE-8975419856 |  | -11.240       | 0.327          | n/a                          | Chembridge | 16452556  | 99+        |

| Name | MCULE ID         | Structure                                                                           | Docking score | IFP similarity | SETD2 inhibition @ 100μM (%) | Vendor     | Vendor ID | Purity (%) |
|------|------------------|-------------------------------------------------------------------------------------|---------------|----------------|------------------------------|------------|-----------|------------|
| C10  | MCULE-2814491647 | 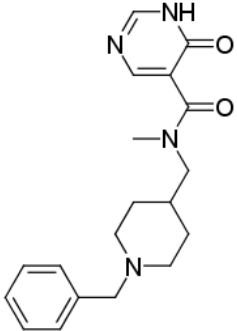   | -10.825       | 0.309          | 64                           | Chembridge | 64423528  | 89         |
| C11  | MCULE-3240644345 |   | -11.623       | 0.362          | 91                           | Chembridge | 96963852  | 92         |
| C12  | MCULE-1543772386 |  | -12.093       | 0.274          | n/a                          | Chembridge | 30238080  | 99+        |

| Name  | MCULE ID         | Structure                                                                           | Docking score | IFP similarity | SETD2 inhibition @ 100μM (%) | Vendor     | Vendor ID | Purity (%) |
|-------|------------------|-------------------------------------------------------------------------------------|---------------|----------------|------------------------------|------------|-----------|------------|
| C12_2 | MCULE-6638297500 | 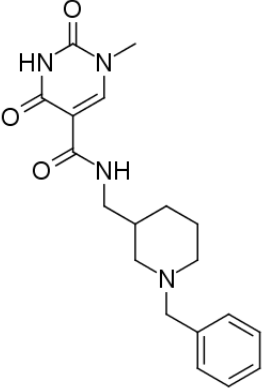   | -11.373       | 0.305          | n/a                          | Chembridge | 84830096  | 99+        |
| C13   | MCULE-7341722870 |   | -12.435       | 0.354          | 83                           | Vitas      | STL135578 | 99+        |
| C14   | MCULE-2483127491 |  | -10.714       | 0.312          | Unavailable                  |            |           |            |

| Name | MCULE ID         | Structure                                                                           | Docking score | IFP similarity | SETD2 inhibition @ 100μM (%) | Vendor  | Vendor ID   | Purity (%) |
|------|------------------|-------------------------------------------------------------------------------------|---------------|----------------|------------------------------|---------|-------------|------------|
| C15  | MCULE-1531128187 | 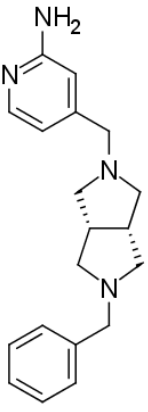   | -10.288       | 0.309          | n/a                          | Enamine | Z1939999448 | 99+        |
| C16  | MCULE-6546954086 |   | -11.358       | 0.351          | 19                           | Enamine | Z2734712913 | 97         |
| C17  | MCULE-7826477380 |  | -11.308       | 0.290          | 69                           | Enamine | Z2582964869 | 91         |



| Name | MCULE ID         | Structure                                                                          | Docking score | IFP similarity | SETD2 inhibition @ 100μM (%) | Vendor     | Vendor ID   | Purity (%) |
|------|------------------|------------------------------------------------------------------------------------|---------------|----------------|------------------------------|------------|-------------|------------|
| C18  | MCULE-9549108437 | 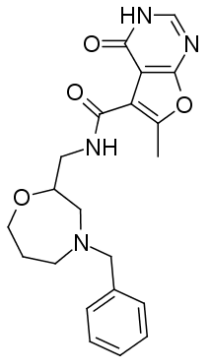  | -11.279       | 0.223          | 73                           | Enamine    | Z1866864777 | 99+        |
| C19  | MCULE-8052135474 |  | -10.410       | 0.298          | 80                           | Chembridge | 90359892    | 94         |

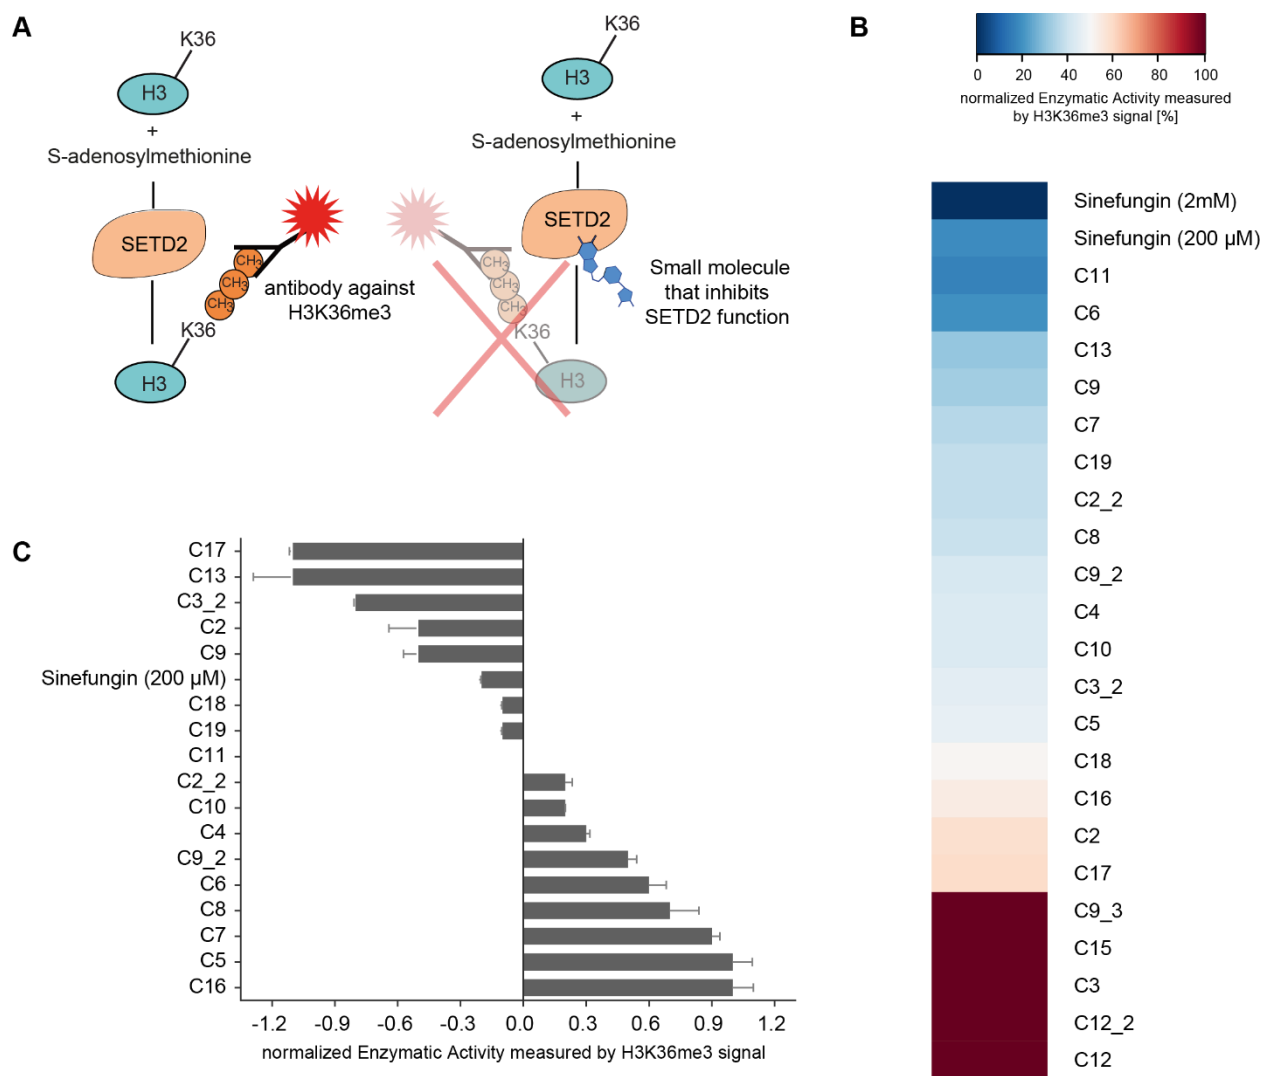

**Figure S4.** Screening of hit compounds with an enzymatic SETD2 assay

A) Schematic representation of the chemiluminescence-based enzyme inhibition assay

B) Heatmap of primary screening data of 22 virtual hits in singlets (100  $\mu$ M). Values were blank corrected and normalized relative to positive control (full enzymatic activity) and to the negative control Sinefungin 2 mM (complete enzymatic activity inhibition).

C) Secondary screen in duplicates at a concentration of 100  $\mu$ M. Error bars depict the standard deviation [%]. Values were blank corrected and normalized.

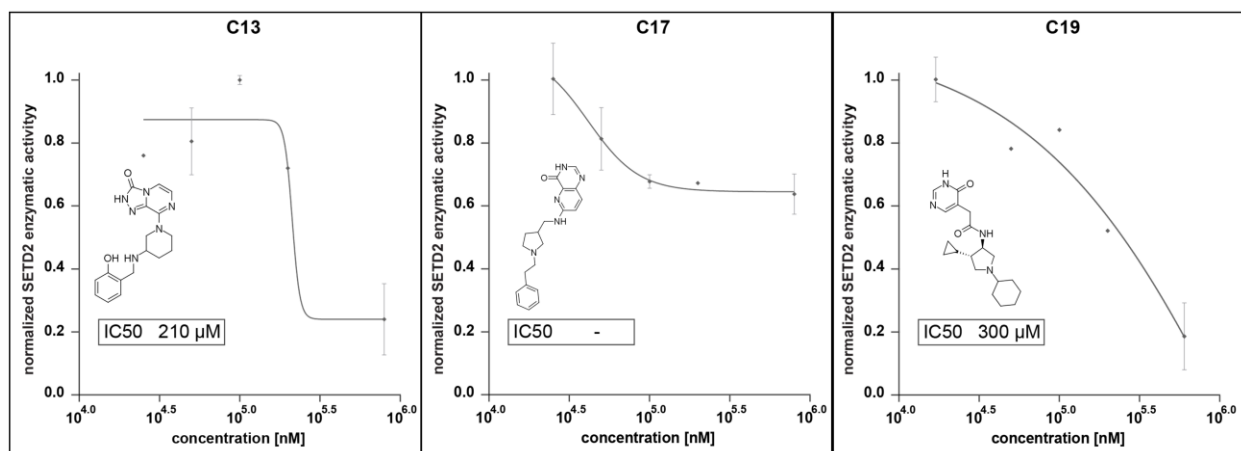

**Figure S5.** Enzymatic IC<sub>50</sub> curves of the hit compounds C13 (A), C17 (B) and C19 (C).

## 6. Cellular Validation of hit compound C13

### Cell culture

MOLM-13 and MV4-11 human leukemia cell lines were obtained from DSMZ (Deutsche Sammlung von Mikroorganismen und Zellkulturen GmbH, [www.dsmz.de](http://www.dsmz.de)) and were cultured in RPMI 1640 (Gibco) supplemented with 10% FBS, 100 U/ml penicillin, 100 μg/ml streptomycin and 4 mM L-Glutamine.

For proliferation curves, cells were seeded at low densities ( $4 \times 10^5$  cells/mL) in biological triplicates and treated with C13 or DMSO, at indicated concentrations at 48 or 72 hours. Cell numbers were determined in regular intervals with the Intellicyt iQue Screener (Essen BioScience, Sartorius Group) and integrated with ForeCyt Software. The GraphPad Prism 8.0 software (San Diego, CA, USA) was used for statistical analyses. A two-tailed students t-test was used for p-value determination. \*  $p < 0.05$ , \*\*  $p < 0.01$ , \*\*\*  $p < 0.001$ , \*\*\*\*  $p < 0.0001$ .

### Western Blot

Western blotting was performed according to standard laboratory protocols. Briefly, cells were collected after 48 h of C13 treatment (100 μM), washed with PBS and whole-cell lysates were

prepared in Laemmli buffer. Samples were incubated at 95°C for 10 min, followed by 15 min of sonication. Protein concentrations were measured using the Pierce BCA Protein Assay Kit (Thermo scientific, 23225). Antibodies used were: anti-H3K36me3 (Abcam, 9050; 1:2000), anti-H3 (Abcam, 1791; 1:5000) and anti-H3K36me2 (Active Motif, 61019, 1:1000). Secondary antibodies used were: goat anti-mouse HRP (Thermo Fisher Scientific, 31430; 1:10000) and goat anti-rabbit HRP (Thermo Fisher Scientific 31460; 1:10000).

## **7. Other potential targets**

Histone methyltransferase structures with a bound SAM, SAH or SNF ligand were collected from the Protein Data Bank and prepared with the default settings of Schrödinger Prime's One-step Protein Preparation interface. C13 was docked into these structures with the standard precision (SP) protocol of Glide, as reported in the main study. In Table S7, we have collected the Glide docking scores of the best binding pose of C13 in each of these structures and visually checked whether the core scaffold of C13 could mimic the binding mode of the adenine core of SAM/SAH/SNF (the latter was marked as "yes" if C13 reproduced 2 out of 2, or at least 2 out of 3 hydrogen bonds of the adenine core in the respective PDB structure). This analysis highlights six methyltransferases, where C13 was docked with a pose that i) has a docking score close to or below -10.0, and ii) reproduces the binding motif of the adenine core of the reference ligand. These are NSD1, ASH1L, SETMAR, EHMT2, SUV420H1 and SMYD2.

**Table S7.** Docking scores and visual check results of C13 in the binding pocket of other histone methyltransferase enzymes.

| Name              | Uniprot                | PDB  | Docking score | Core pose |
|-------------------|------------------------|------|---------------|-----------|
| NSD1              | <a href="#">Q96L73</a> | 3OOI | -9.931        | yes       |
|                   |                        | 6KQP | -8.526        | yes       |
| NSD2 (WHSC1)      | <a href="#">Q96028</a> | 5LSU | -8.724        | yes       |
| ASH1L             | <a href="#">Q9NR48</a> | 4YNM | -9.935        | yes       |
| SETD7             | <a href="#">Q8WTS6</a> | 1N6A | -7.565        | no        |
| KMT2A (MLL1)      | <a href="#">Q03164</a> | 2W5Y | -8.214        | no        |
| KMT2B (MLL2/MLL4) | <a href="#">Q9UMN6</a> | 7BRE | -7.958        | no        |
| KMT2D (MLL2/MLL4) | <a href="#">O14686</a> | 4Z4P | -9.408        | no        |
| KMT2C (MLL3)      | <a href="#">Q8NEZ4</a> | 5F59 | -7.966        | no        |
| SETMAR            | <a href="#">Q53H47</a> | 3BO5 | -10.069       | yes       |
| SUV39H2           | <a href="#">Q9H511</a> | 2R3A | -8.343        | yes       |
| EHMT1 (GLP)       | <a href="#">Q9H9B1</a> | 2IGQ | -9.357        | yes       |
| EHMT2 (G9a)       | <a href="#">Q96KQ7</a> | 2O8J | -10.35        | yes       |
| SUV420H1          | <a href="#">Q4FZB7</a> | 3S8P | -10.563       | yes       |
| SMYD2             | <a href="#">Q9NRG4</a> | 3RIB | -10.718       | yes       |
|                   |                        | 3TG4 | -11.321       | yes       |
| SMYD3             | <a href="#">Q9H7B4</a> | 3MEK | -9.027        | no        |
|                   |                        | 3OXL | -9.254        | no        |
|                   |                        | 3OXG | -10.314       | no        |
|                   |                        | 3OXF | -9.449        | yes       |
|                   |                        | 3PDN | -7.903        | no        |
|                   |                        | 3RU0 | -8.511        | no        |

## 8. References

- (1) Tisi, D.; Chiarparin, E.; Tamanini, E.; Pathuri, P.; Coyle, J. E.; Hold, A.; Holding, F. P.; Amin, N.; Martin, A. C. L.; Rich, S. J.; Berdini, V.; Yon, J.; Acklam, P.; Burke, R.; Drouin, L.; Harmer, J. E.; Jeganathan, F.; Van Montfort, R. L. M.; Newbatt, Y.; Tortorici, M.; Westlake, M.; Wood, A.; Hoelder, S.; Heightman, T. D. Structure of the Epigenetic Oncogene MMSET and Inhibition by N-Alkyl Sinefungin Derivatives. *ACS Chem. Biol.* **2016**, *11* (11), 3093–3105. <https://doi.org/10.1021/acscchembio.6b00308>.
- (2) Zheng, W.; Ibáñez, G.; Wu, H.; Blum, G.; Zeng, H.; Dong, A.; Li, F.; Hajian, T.; Allali-Hassani, A.; Amaya, M. F.; Siarheyeva, A.; Yu, W.; Brown, P. J.; Schapira, M.; Vedadi, M.; Min, J.; Luo, M. Sinefungin Derivatives as Inhibitors and Structure Probes of Protein Lysine Methyltransferase SETD2. *J. Am. Chem. Soc.* **2012**, *134* (43), 18004–18014. <https://doi.org/10.1021/ja307060p>.
- (3) Salam, N. K.; Nuti, R.; Sherman, W. Novel Method for Generating Structure-Based Pharmacophores Using Energetic Analysis. *J. Chem. Inf. Model.* **2009**, *49* (10), 2356–2368. <https://doi.org/10.1021/ci900212v>.
- (4) Loving, K.; Salam, N. K.; Sherman, W. Energetic Analysis of Fragment Docking and Application to Structure-Based Pharmacophore Hypothesis Generation. *J. Comput. Aided. Mol. Des.* **2009**, *23* (8), 541–554. <https://doi.org/10.1007/s10822-009-9268-1>.
- (5) Nicholls, A. Confidence Limits, Error Bars and Method Comparison in Molecular Modeling. Part 1: The Calculation of Confidence Intervals. *J. Comput. Aided. Mol. Des.* **2014**, *28* (9), 887–918. <https://doi.org/10.1007/s10822-014-9753-z>.
- (6) Schrödinger Release 2020-4: Schrödinger Suite 2020-4 Protein Preparation Wizard, LigPrep, Epik, ConfGen, Phase, Glide, Canvas; Schrödinger, LLC, New York, NY, 2020.
- (7) Friesner, R. A.; Banks, J. L.; Murphy, R. B.; Halgren, T. A.; Klicic, J. J.; Mainz, D. T.; Repasky, M. P.; Knoll, E. H.; Shelley, M.; Perry, J. K.; Shaw, D. E.; Francis, P.; Shenkin, P. S. Glide: A New Approach for Rapid, Accurate Docking and Scoring. 1. Method and Assessment of Docking Accuracy. *J. Med. Chem.* **2004**, *47* (7), 1739–1749.
- (8) Halgren, T. A.; Murphy, R. B.; Friesner, R. A.; Beard, H. S.; Frye, L. L.; Pollard, W. T.; Banks, J. L. Glide: A New Approach for Rapid, Accurate Docking and Scoring. 2. Enrichment Factors in Database Screening. *J. Med. Chem.* **2004**, *47* (7), 1750–1759.
- (9) Yang, S.; Zheng, X.; Lu, C.; Li, G. M.; Allis, C. D.; Li, H. Molecular Basis for Oncohistone H3 Recognition by SETD2 Methyltransferase. *Genes Dev.* **2016**, *30* (14), 1611–1616. <https://doi.org/10.1101/gad.284323.116>.
